# Supplementary material for: Differential physiological roles for BIN1 isoforms in skeletal muscle development, function and regeneration
Source: Oxford University Press journal article supplement (doi:10.1242/dmm.044354), 2020-09-29
Supplement: dmm044354supp.pdf [file dmm044354supp.pdf]

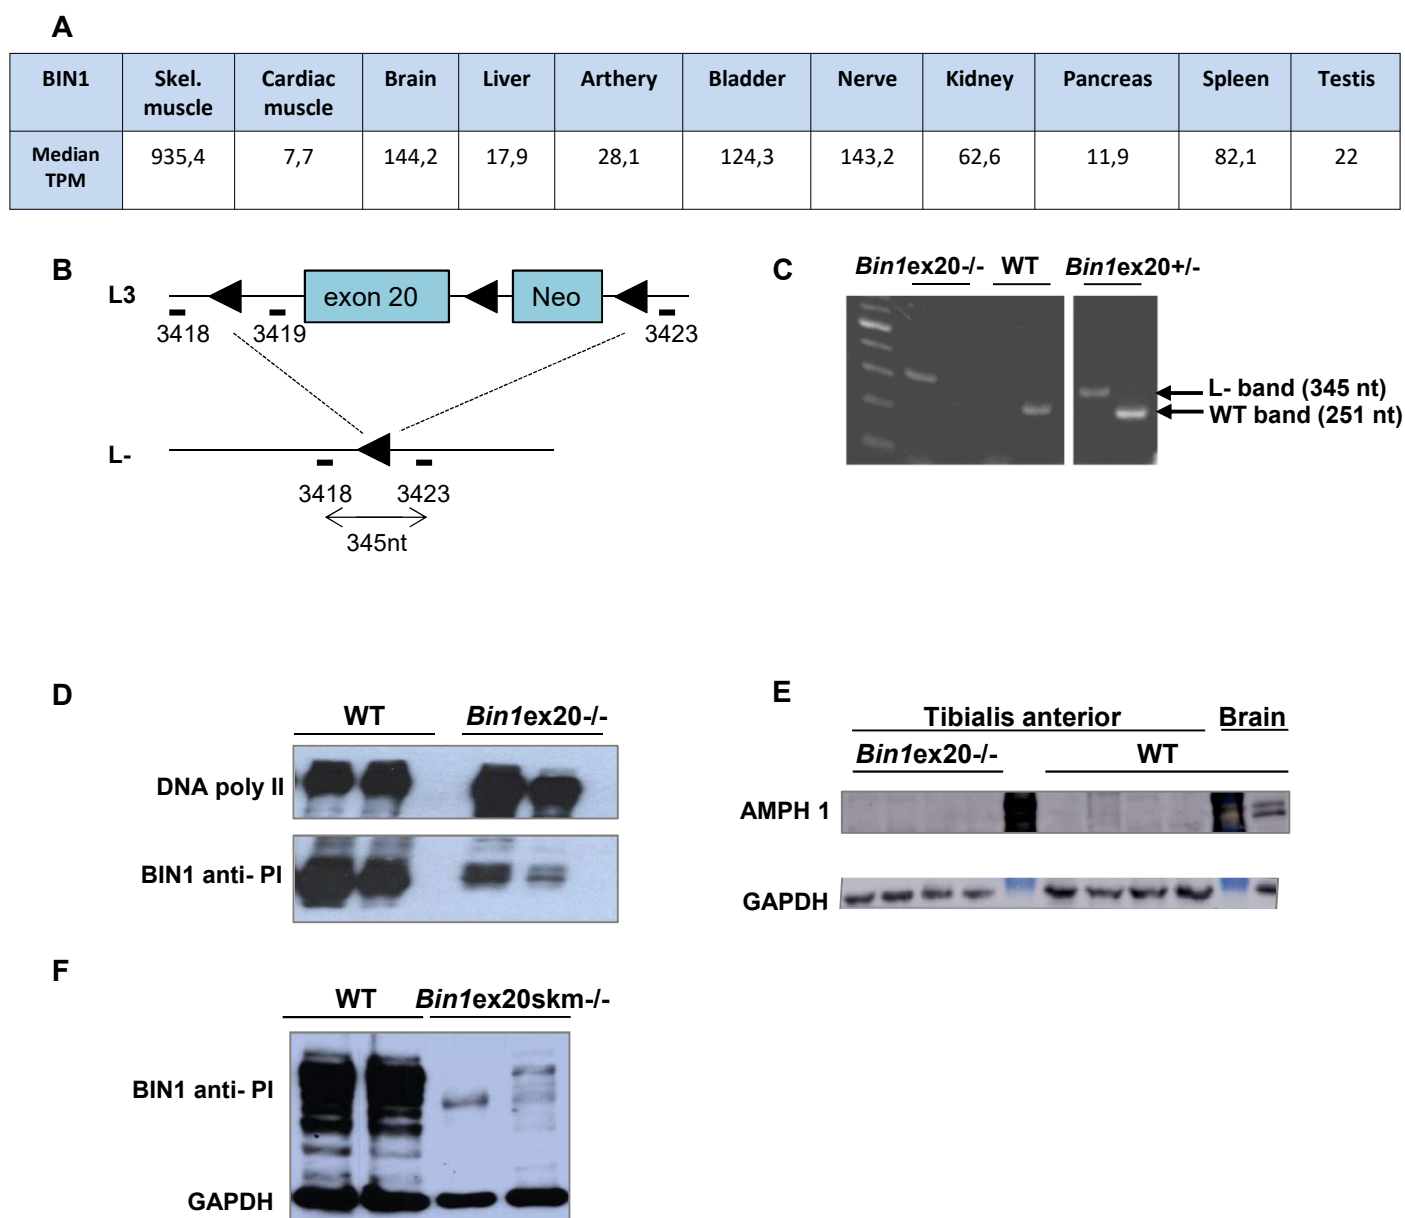

**Figure S1. *BIN1* expression and targeted disruption of mouse *Bin1* exon 20.** (A) *BIN1* RNA levels in adult human tissues based on the GTEx database; TPM = transcripts per million. (B) The genomic region surrounding the targeted exon 20 of *Bin1* in mice; L3: construct inserted into the locus, and L-: deleted allele. Triangle: loxP sites; bars and numbers: primers; Neo: neomycin resistance. The PCR amplification product of the deleted allele is 345 nt long. (C) PCR from genomic DNA of WT, *Bin1ex20-/-* and *Bin1ex20+/-* mice. (D-E) Constitutive deletion was achieved with a CMV promoter and induced a strong reduction in total BIN1 protein level in skeletal muscle. (D) Western blot with an antibody against the muscle-specific PI domain. All of the BIN1 muscle isoforms express the muscle-specific PI domain after birth. (E) No compensatory upregulation of AMPH1 using anti-amphiphysin 1 antibody. (F) Skeletal muscle deletion was achieved with the ACTA1 (human skeletal actin, HSA) promoter and induced a strong reduction in total BIN1 protein level in skeletal muscle.

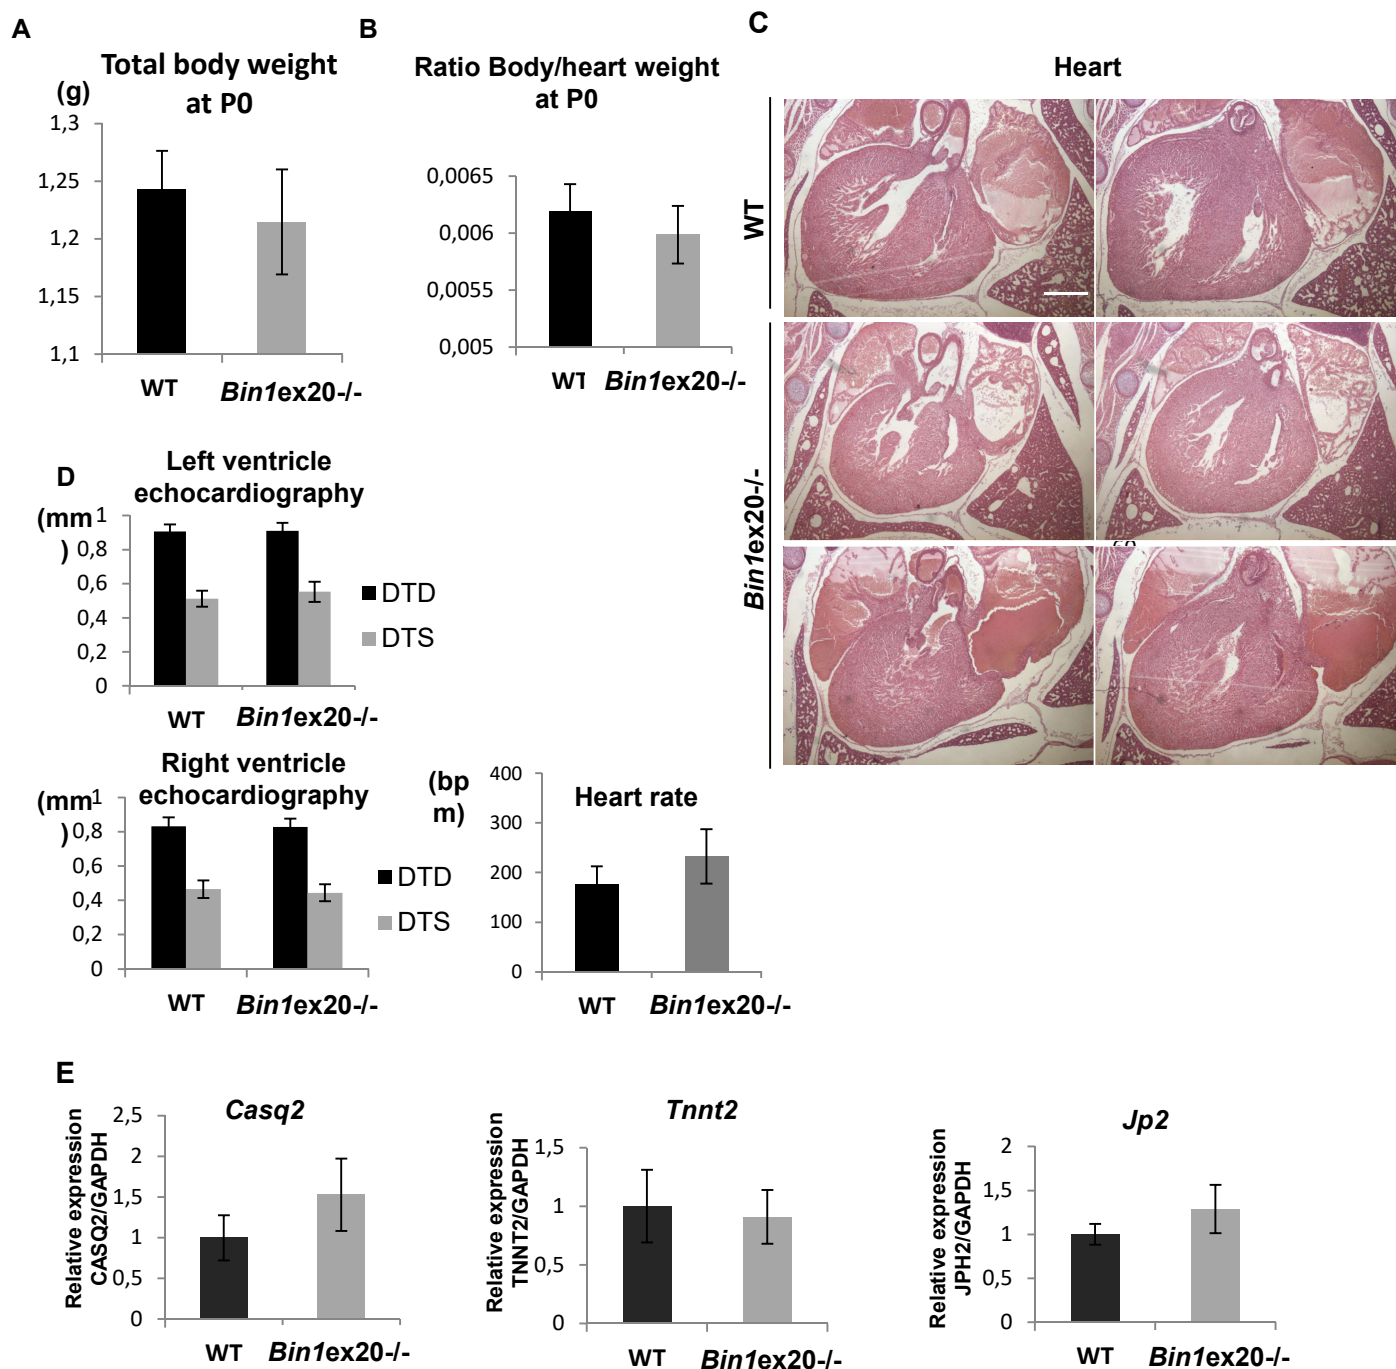

**Figure S2. Heart characterization in constitutive *Bin1ex20<sup>-/-</sup>* mice.** (A) Total body weight of newborn WT and *Bin1ex20<sup>-/-</sup>* mice was not significantly different ( $n \geq 8$  mice per group). (B) Ratio of the heart weight on body weight ( $n \geq 7$  mice per group). (C) Histology of the heart in a newborn WT and two *Bin1ex20<sup>-/-</sup>* mice; 2 serial sections shown. Scale bar 200  $\mu$ m. (D) Echocardiography done in utero on E18.5 embryos showing no difference in the systolic (DTS) and diastolic (DTD) contraction in left (upper panel) or right (lower panel) ventricle as well as in heart rate ( $n \geq 8$  mice per group). (E) RT-qPCR from the heart of newborn P0 mice showing no difference in relative expression of calsequestrin 2 (*Casq2*), troponin T (*Tnnt2*) and junctophilin 2 (*Jp2*), three markers of cardiac integrity ( $n \geq 3$  mice per group). No statistical differences.

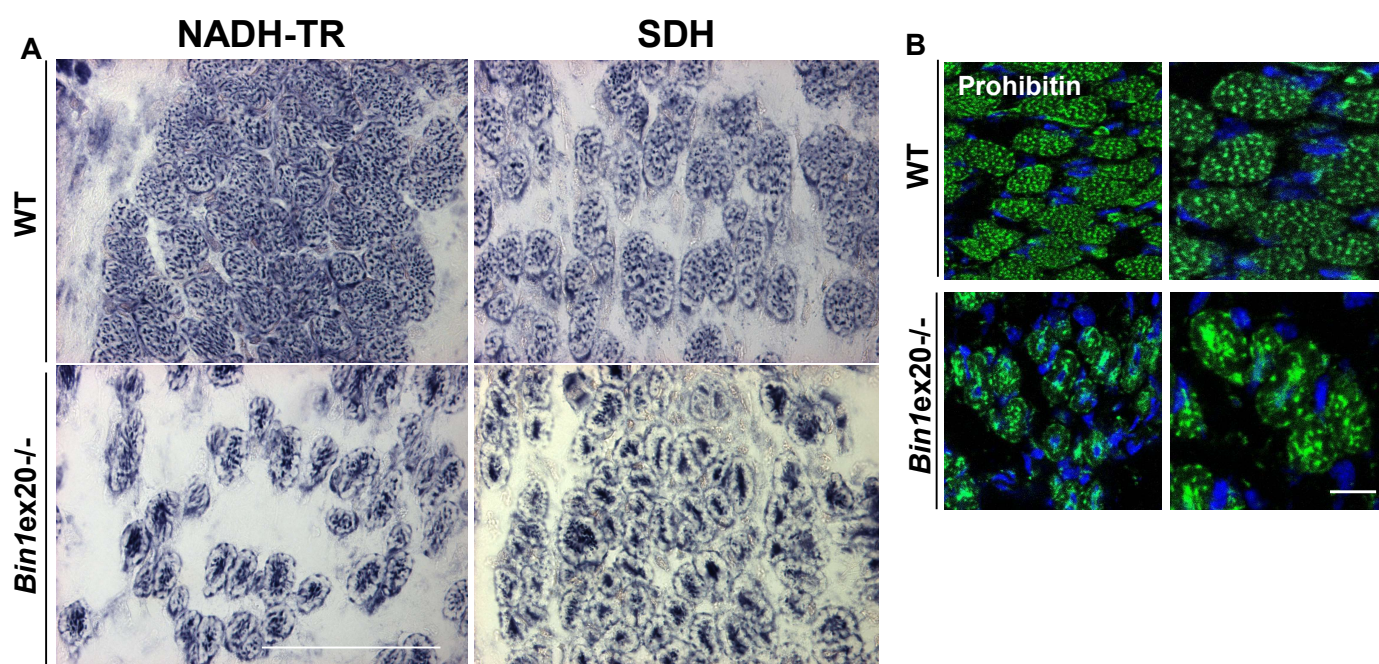

**Figure S3. Anomalies of mitochondria positioning in *Bin1ex20<sup>-/-</sup>* muscles.** (A) NADH-TR and SDH staining in newborn WT and KO mice showing collapse of staining towards the center in KO muscle. Scale bar 200 μm. (B) Prohibitin localization on KO and WT on 8 μm transversal muscle sections at birth. Scale bar 10 μm.

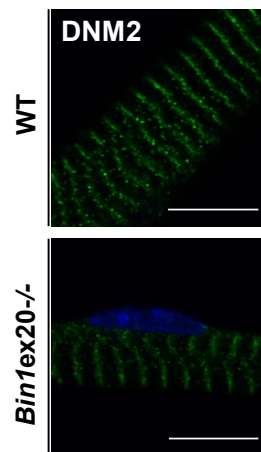

**Figure S4. Normal localization of dynamin 2 in newborn constitutive *Bin1ex20<sup>-/-</sup>* mice.** DNM2 staining on isolated fibers. Scale bar 5  $\mu$ m.



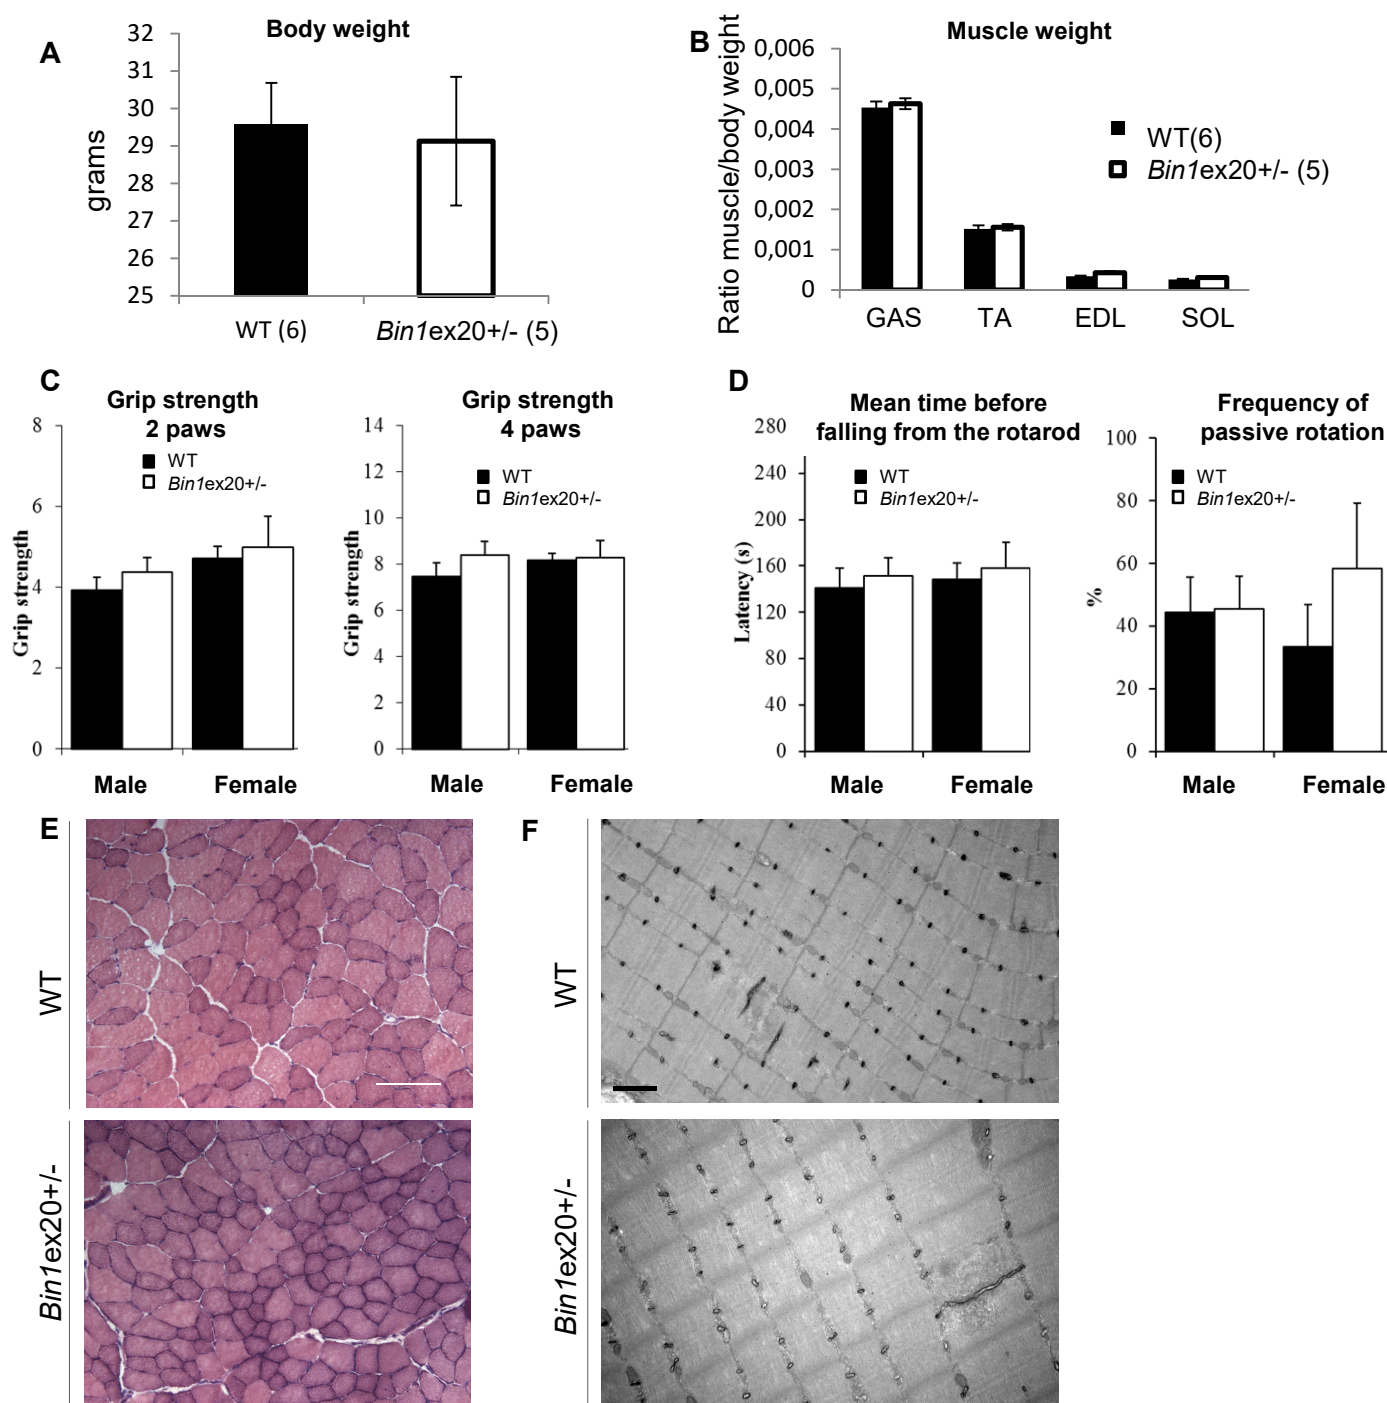

**Figure S5. Phenotyping of adult *Bin1ex20+/-* heterozygous mice at 12 weeks.**(A) Body weight of *Bin1ex20+/-* mice (n = 5) and wild type (WT, n = 6) littermates. (B) Muscle mass ratio in WT and *Bin1ex20+/-* mice. (C) Grip strength and (D) rotarod performance in female and male *Bin1ex20+/-* mice. (E) HE staining of TA muscles. Scale bar 50  $\mu$ m. (F) Potassium-ferrocyanide staining of T-tubules and intracellular ultrastructure of *Bin1ex20+/-* and WT muscles. Scale bar 1  $\mu$ m. No statistical differences.

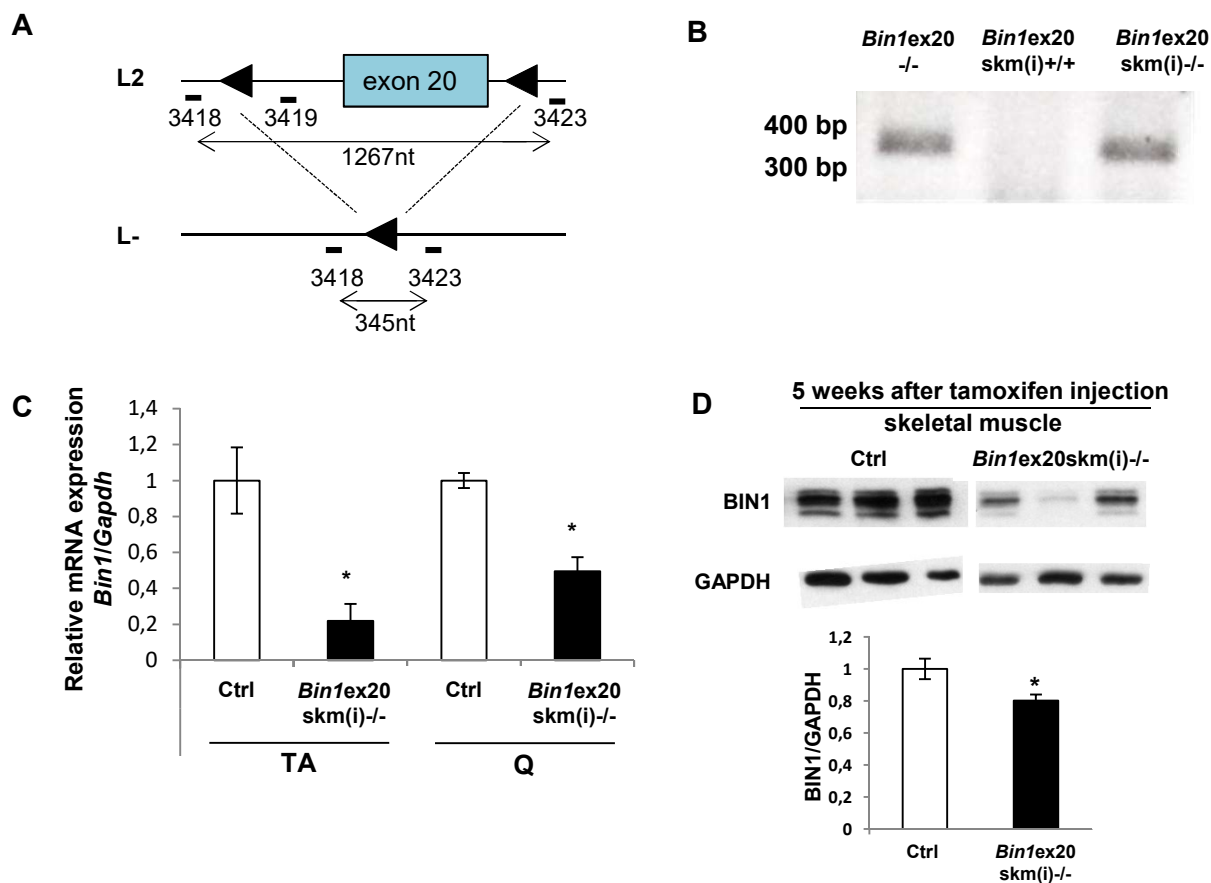

**Figure S6. Tamoxifen induced *Bin1* exon 20 deletion from 7 weeks of age.**(A) The genomic region surrounding the targeted exon 20 of *Bin1*; L2: floxed allele and L-: deleted allele. Triangle: loxP sites; bars and numbers: primers. The PCR amplification product of the deleted allele is 345 nt long. (B) PCR showing exon 20 excision from muscles of constitutive *Bin1ex20*<sup>-/-</sup>, tamoxifen treated control (floxed L2 *Bin1ex20* without Cre recombinase) and tamoxifen treated L2 *Bin1ex20skm(i)* (thus *Bin1ex20skm(i)*<sup>-/-</sup>) mice. (C) RT-qPCR from floxed *Bin1ex20* controls and *Bin1ex20skm(i)*<sup>-/-</sup> mice from *tibialis anterior* (TA) and quadriceps (Q) five weeks after tamoxifen injections. (D) BIN1 protein level 5 weeks after intraperitoneal tamoxifen injection. All graphs depict mean ± s.e.m. (\*p < 0.05). Student t-test; n ≥ 3 mice per group.

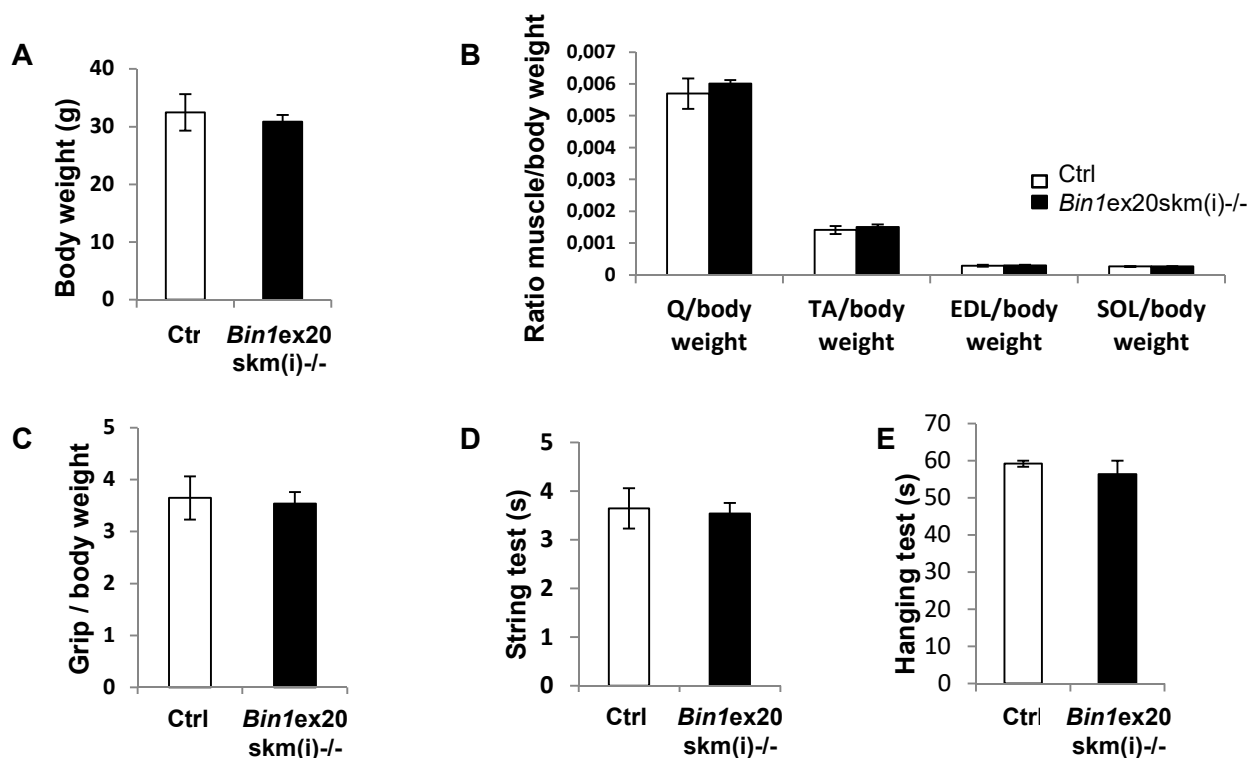

**Figure S7. Phenotyping of *Bin1ex20skm(i)-/-* mice 25 weeks after tamoxifen injection.** (A) Body weight. Control is tamoxifen treated floxed L2 *Bin1x20* without Cre recombinase. (B) Ratio of muscle/body weight of different muscles (TA, *tibialis anterior*; Q, *quadriceps*; EDL, *extensor digitorum longus*; SOL, *soleus*). (C) The grip test was performed using the 2 front paws. (D) String test (time taken to rise hind limbs to wire). (E) Hanging test (time suspended from a cage lid, max time 60 sec).  $n \geq 6$  mice per group. No statistical differences.

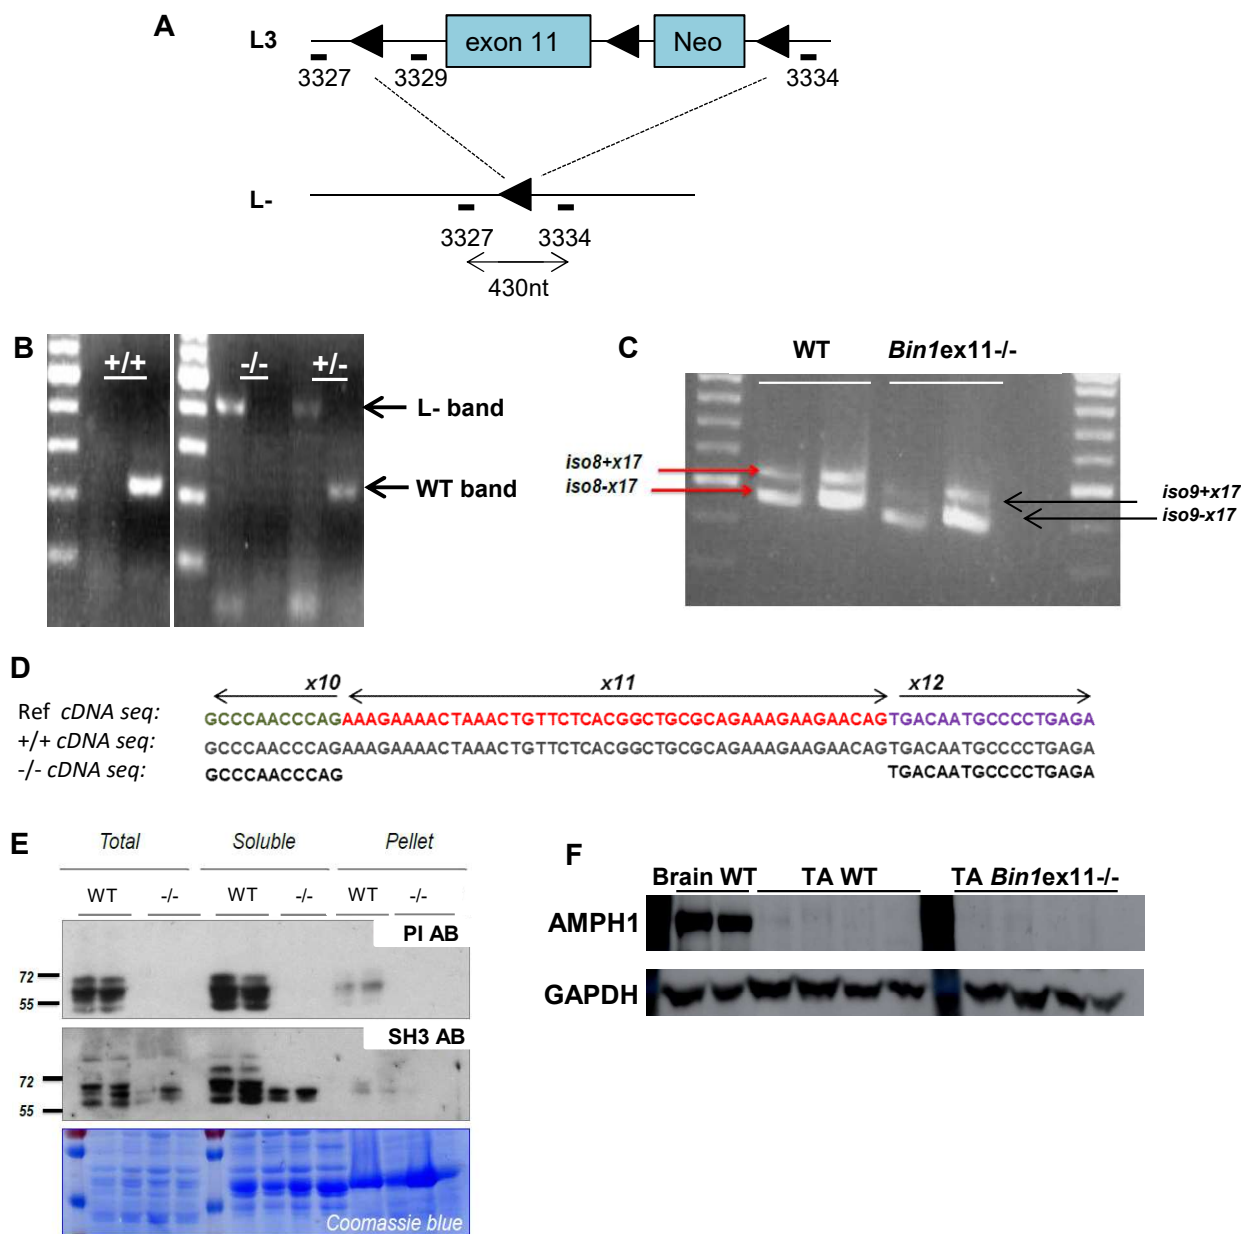

**Figure S8. Targeted disruption of mouse *Bin1* exon 11 to create *Bin1ex11*<sup>-/-</sup> mice.** (A) The genomic region surrounding the targeted exon 11 of *Bin1*. Deletion of the muscle-specific exon 11 is predicted to lead to an in-frame transcript corresponding to ubiquitous isoforms. Triangle: loxP sites; bars and numbers: primers; Neo: neomycin resistance. The PCR amplification product of the deleted allele is 430 nt long. (B) PCR genotyping from the WT (+/+), *Bin1ex11*<sup>-/-</sup> and *Bin1ex11*<sup>+/-</sup> mice. (C) RT-PCR from WT and *Bin1ex11*<sup>-/-</sup> TA muscles between exons 9 and 19 showing complete removal of exon 11 in *Bin1ex11*<sup>-/-</sup> and the presence of 2 isoforms differing by inclusion or exclusion of alternative exon 17. *Bin1* iso8 (+/- exon 17) contains the exon 11 and is found only in muscle while *Bin1* iso9 (+/- exon 17) does not encompass exon 11 and is ubiquitous. (D) cDNA sequences from WT and *Bin1ex11*<sup>-/-</sup> TA muscles, showing exon 11 is removed and neighboring exons are present. (E) Western blot using muscle-specific BIN1 antibody (anti-PI domain) showing complete lack of the PI domain encoded by exon 11 in TA. Pan-BIN1 antibody (against SH3 domain) showing the presence of iso9. (F) Western blot from brain and TA muscle probed with anti-AMPH1 antibody.



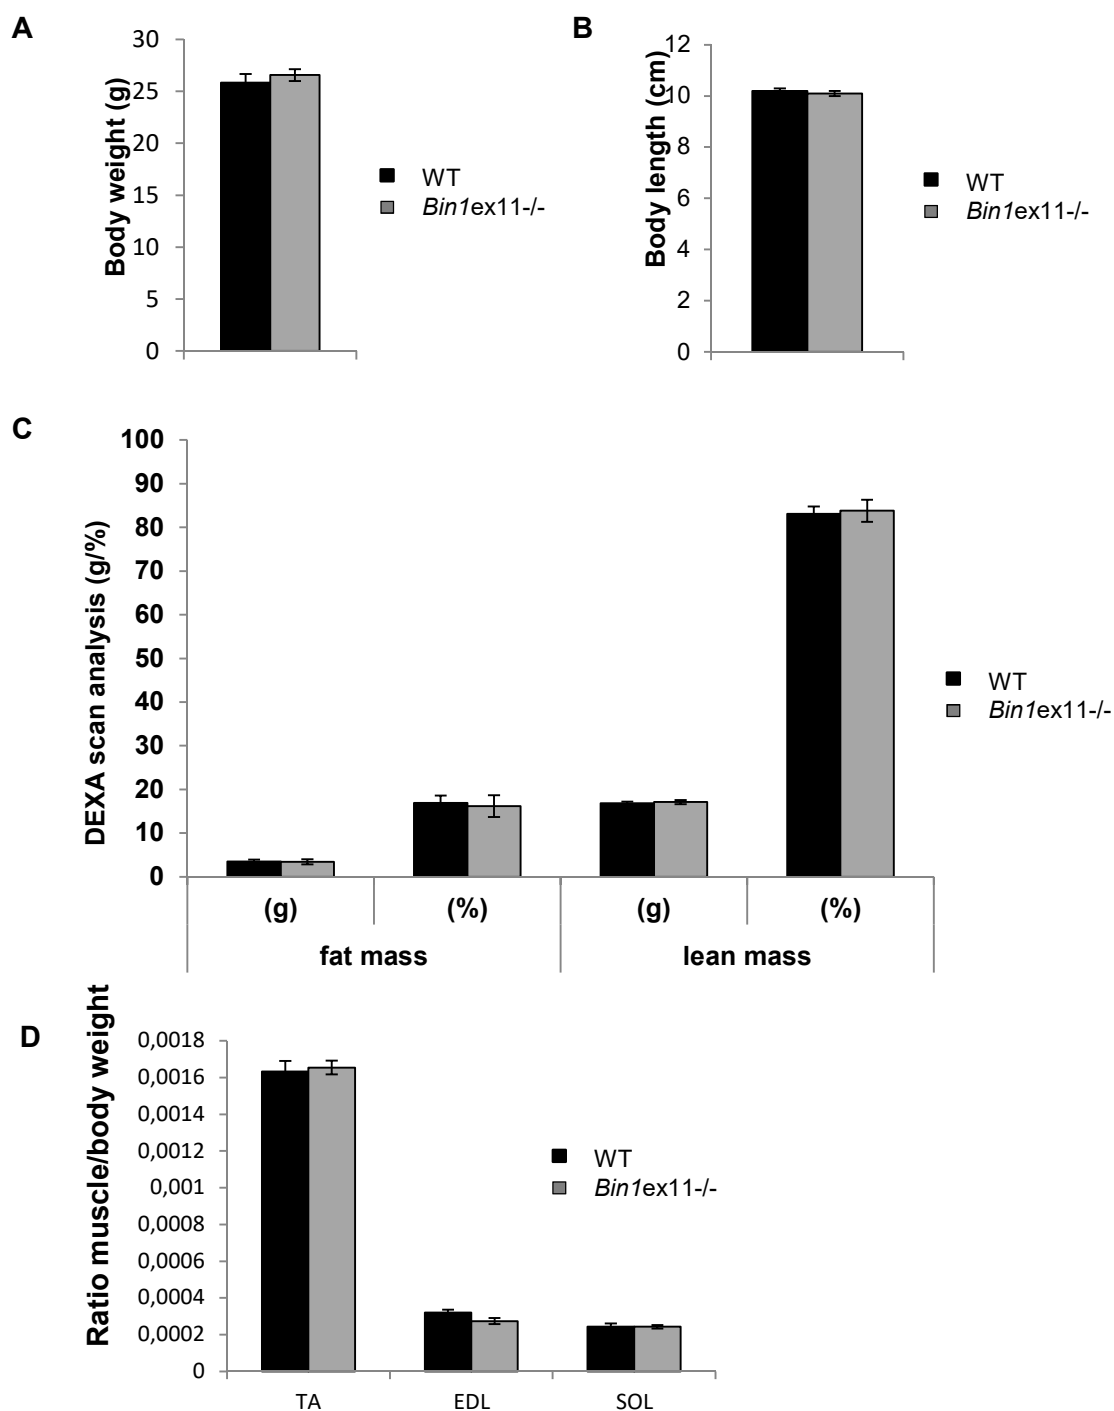

**Figure S9. Body composition of 12-week-old *Bin1ex11*<sup>-/-</sup> mice.** (A) Body weight and (B) body length of *Bin1ex11*<sup>-/-</sup> mice did not differ from WT littermates. (C) DEXA scan analysis did not show any strong difference in the body composition between *Bin1ex11*<sup>-/-</sup> mice and WT. (D) Muscle mass over body weight ratio for *tibialis anterior* (TA), *extensor digitorum longus* (EDL) and *soleus* (SOL). All graphs depict mean  $\pm$  s.e.m ( $n \geq 7$  mice per group). No statistical differences.

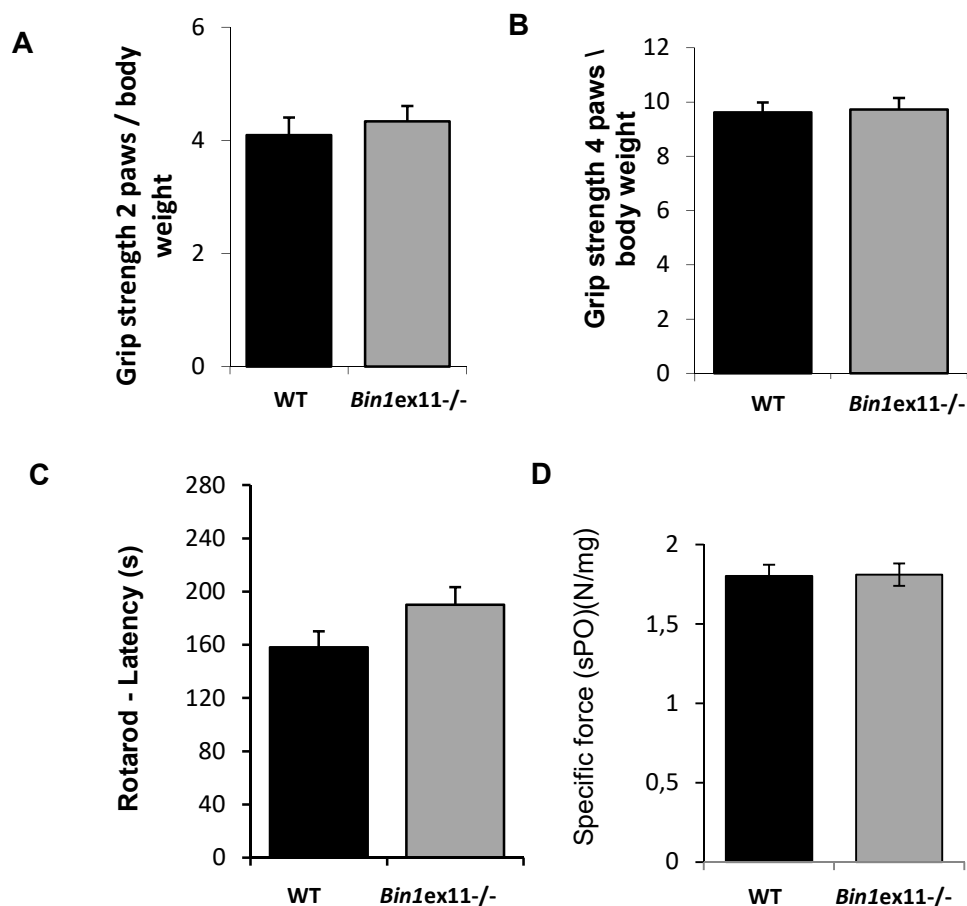

**Figure S10. Muscle function analysis in 12-week-old *Bin1ex11*<sup>-/-</sup> mice.** The Grip test was performed using 2 (A) or 4 (B) paws. (C) Further motor evaluation was performed with rotarod and the latency before mice felt was noted. (D) The specific maximal force of the TA muscle represents the absolute maximal force related to muscle weight. All graph depict mean  $\pm$  s.e.m ( $n \geq 6$  mice per group). No statistical differences.

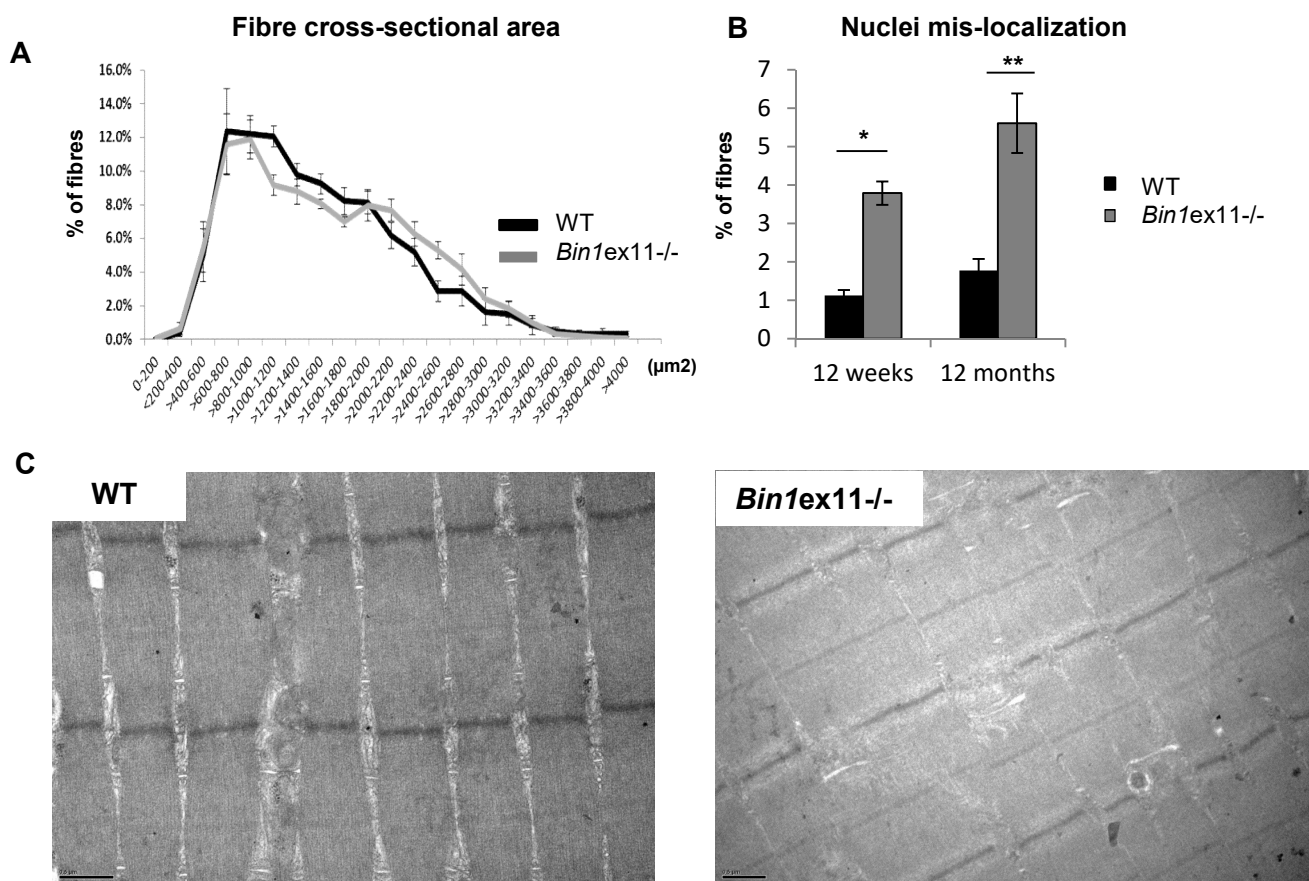

**Figure S11. Histological and ultrastructural analyses of *Bin1ex11*<sup>-/-</sup> muscles.**(A) TA muscles fiber cross-sectional area at 12 weeks, grouped into 200  $\mu\text{m}^2$  intervals and represented as the percentage of total fibers (n = 5-7 mice). (B) Frequency of fibers with internal or central nuclei at 12 weeks and 12 months (n = 5 mice). (C) TA muscle ultrastructure analyzed by electron microscopy at 12 weeks. Scale bar 1  $\mu\text{m}$ . All graph depict mean  $\pm$  s.e.m. (\* $p < 0.05$ , \*\* $p < 0.01$ ). Student t-test.

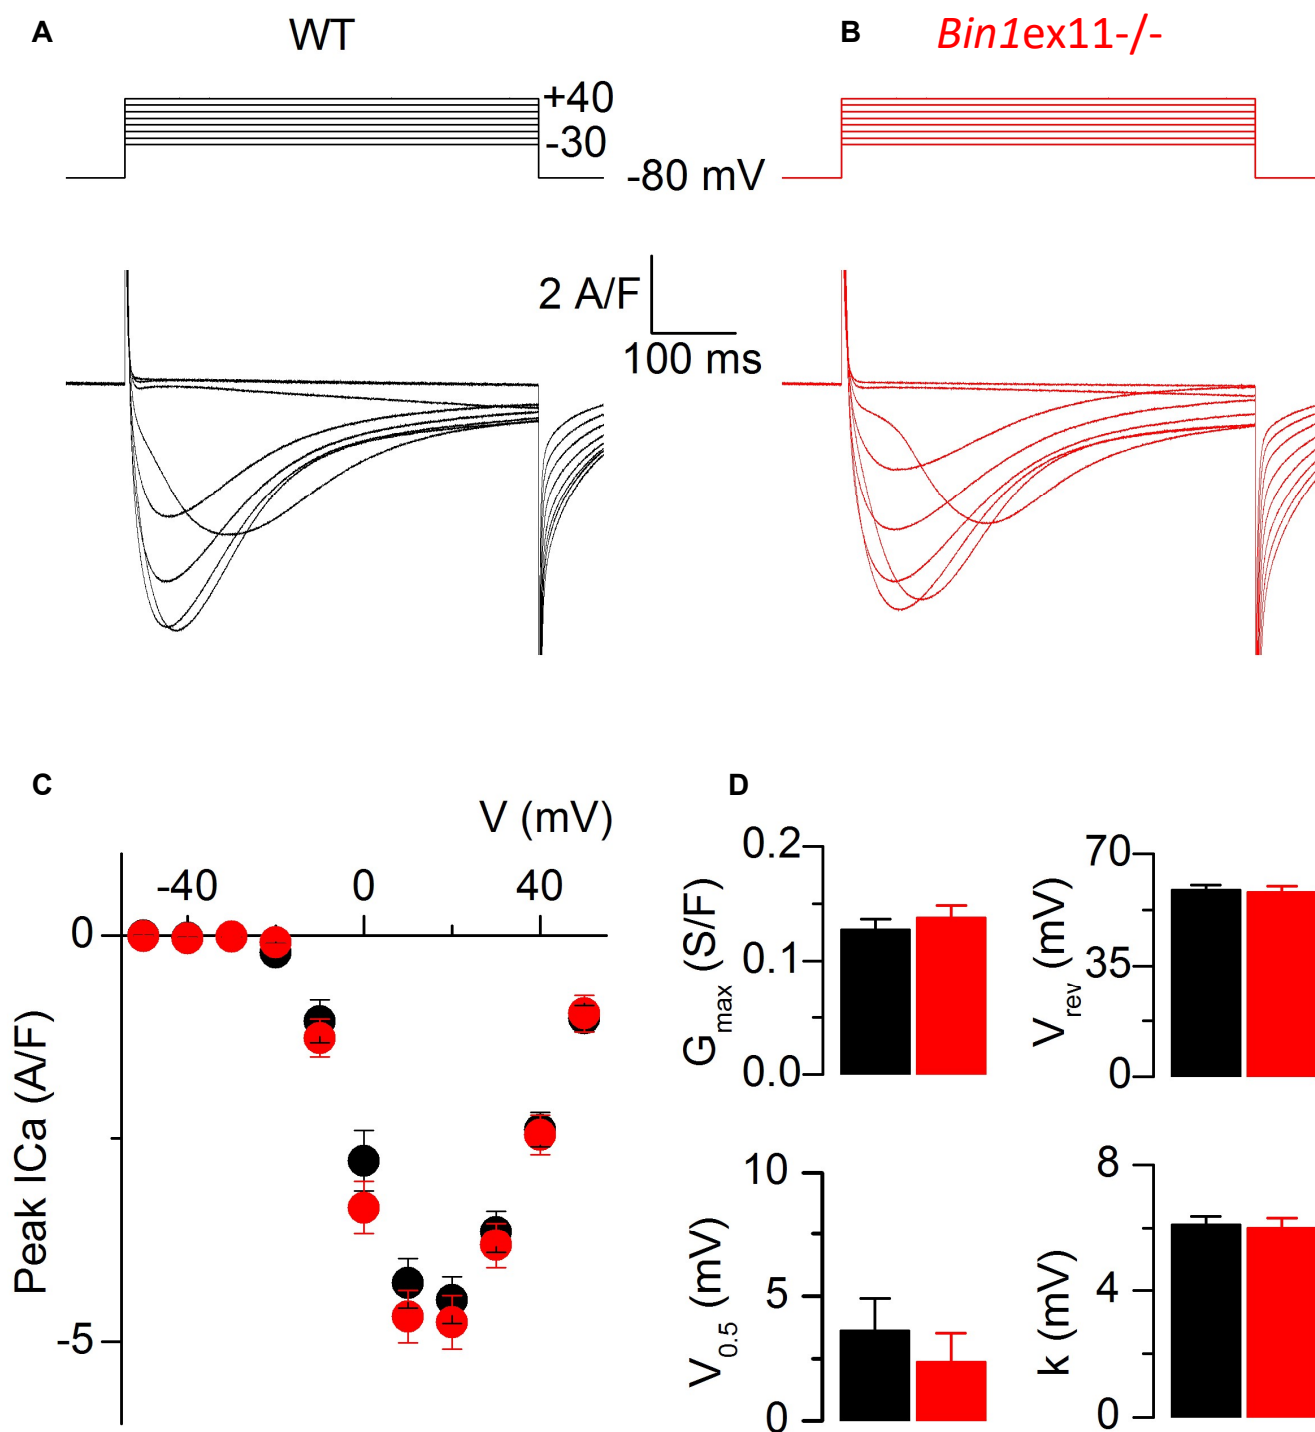

**Figure S12. DHPR calcium current in muscle fibers from WT and *Bin1ex11*<sup>-/-</sup> mice.** Representative Ca<sup>2+</sup> current traces from a fiber isolated from a WT mouse (A) and from a *Bin1ex11*<sup>-/-</sup> mouse (B) in response to the pulse protocol shown above. (C) Mean voltage-dependence of the peak Ca<sup>2+</sup> current in the two groups of fibers. (D) Mean values for the parameters obtained from fitting each current vs voltage dataset with Equation 1 (see methods). No statistical differences.



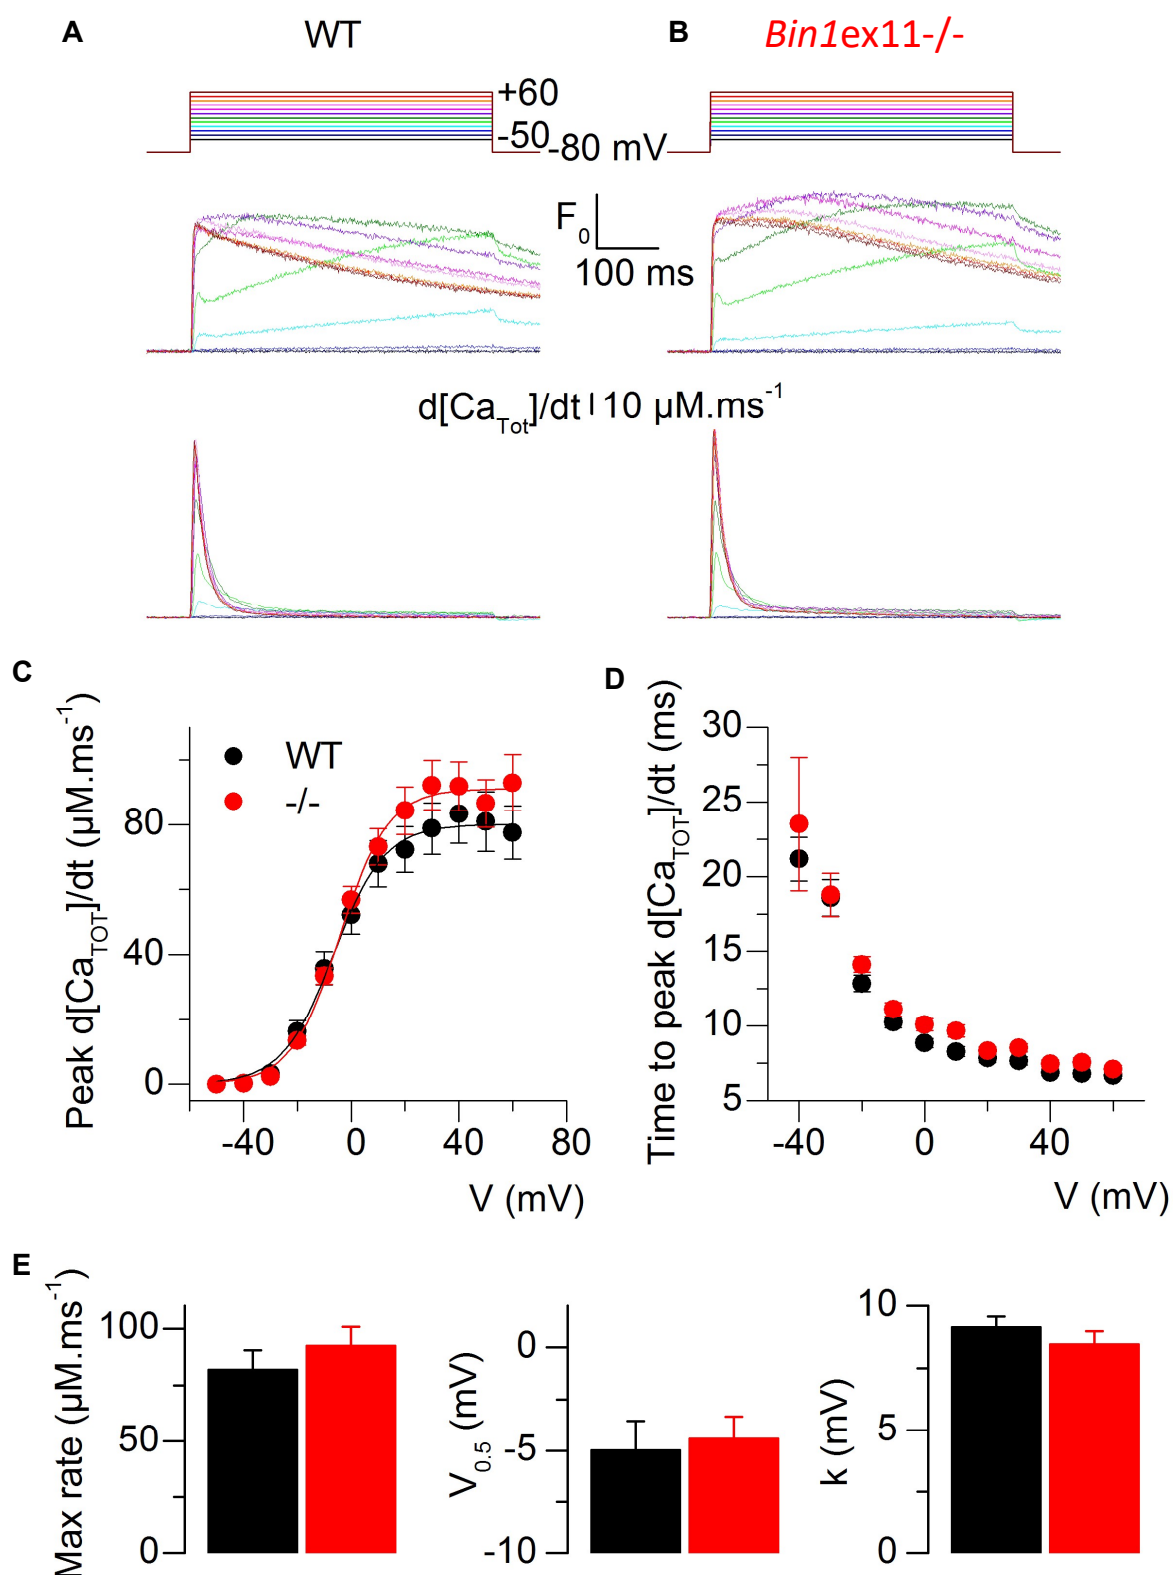

**Figure S13. Voltage-activated SR calcium release in muscle fibers from WT and *Bin1ex11*<sup>-/-</sup> mice.** Representative rhod-2  $Ca^{2+}$  transients ( $F_0$ ) and below corresponding  $Ca^{2+}$  release flux traces ( $d[Ca_{Tot}]/dt$ ) in a muscle fiber from a WT mouse (A) and from a *Bin1ex11*<sup>-/-</sup> mouse (B) in response to the pulse protocol shown on top. Dotted graphs present the mean voltage-dependence of the peak rate of SR  $Ca^{2+}$  release (C) and of the time to peak  $Ca^{2+}$  release (D) in the two groups of muscle fibers. (E) Mean values for maximal rate of SR  $Ca^{2+}$  release (Max rate), mid-activation voltage ( $V_{0.5}$ ) and steepness factor ( $k$ ) obtained in the two groups of fibers, by fitting a Boltzmann function to data from each fiber. No statistical differences.

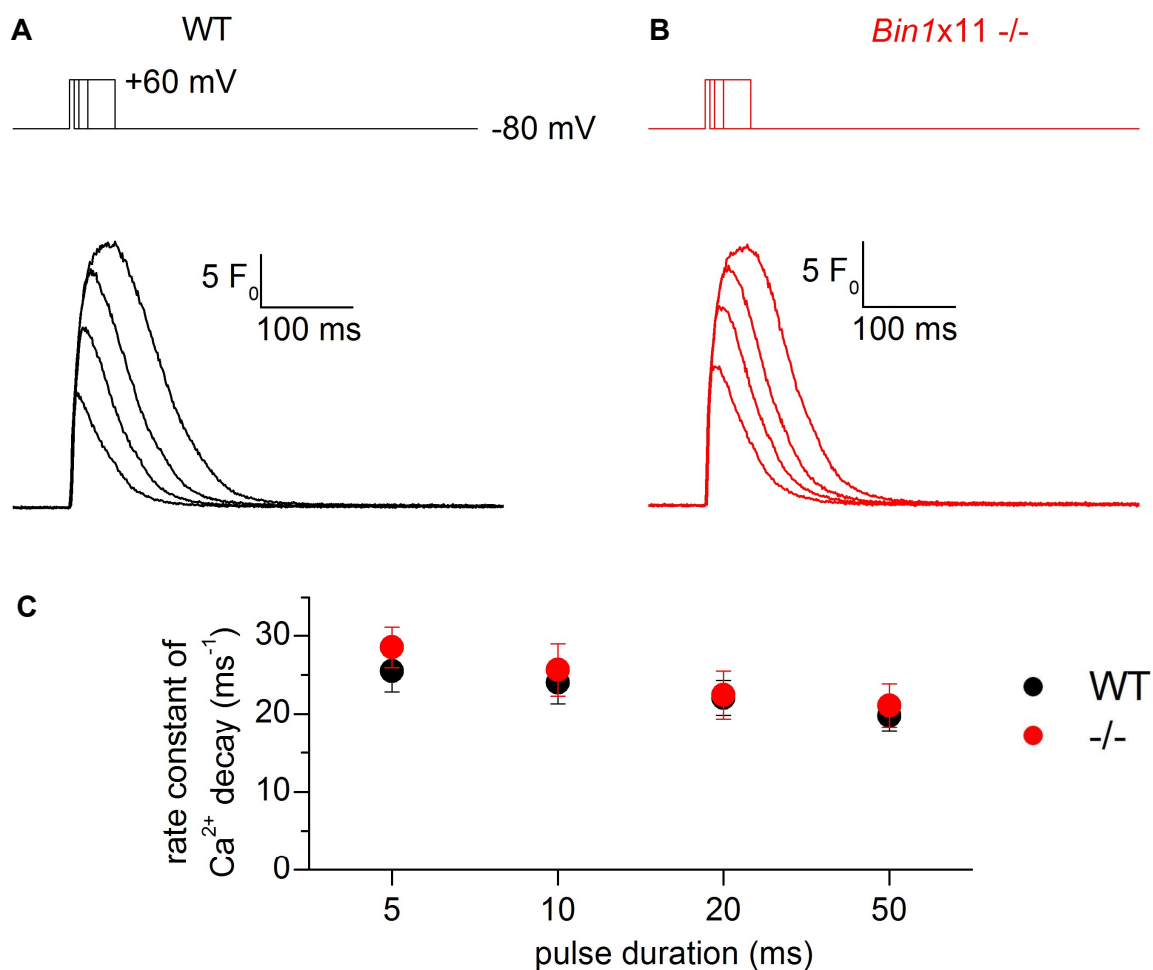

**Figure S14. Myoplasmic  $Ca^{2+}$  removal in muscle fibers from WT and *Bin1ex11* $-/-$  mice.** Fluo-4 FF  $Ca^{2+}$  transients elicited by short voltage-clamp depolarizing pulses of increasing duration in a muscle fiber from a WT (A) and from a *Bin1ex11* $-/-$  mouse (B). (C) Mean values for the rate constant of  $Ca^{2+}$  decay in the two groups of fibers, obtained from fitting a single exponential function to the declining phase of the transients after the end of the pulses.

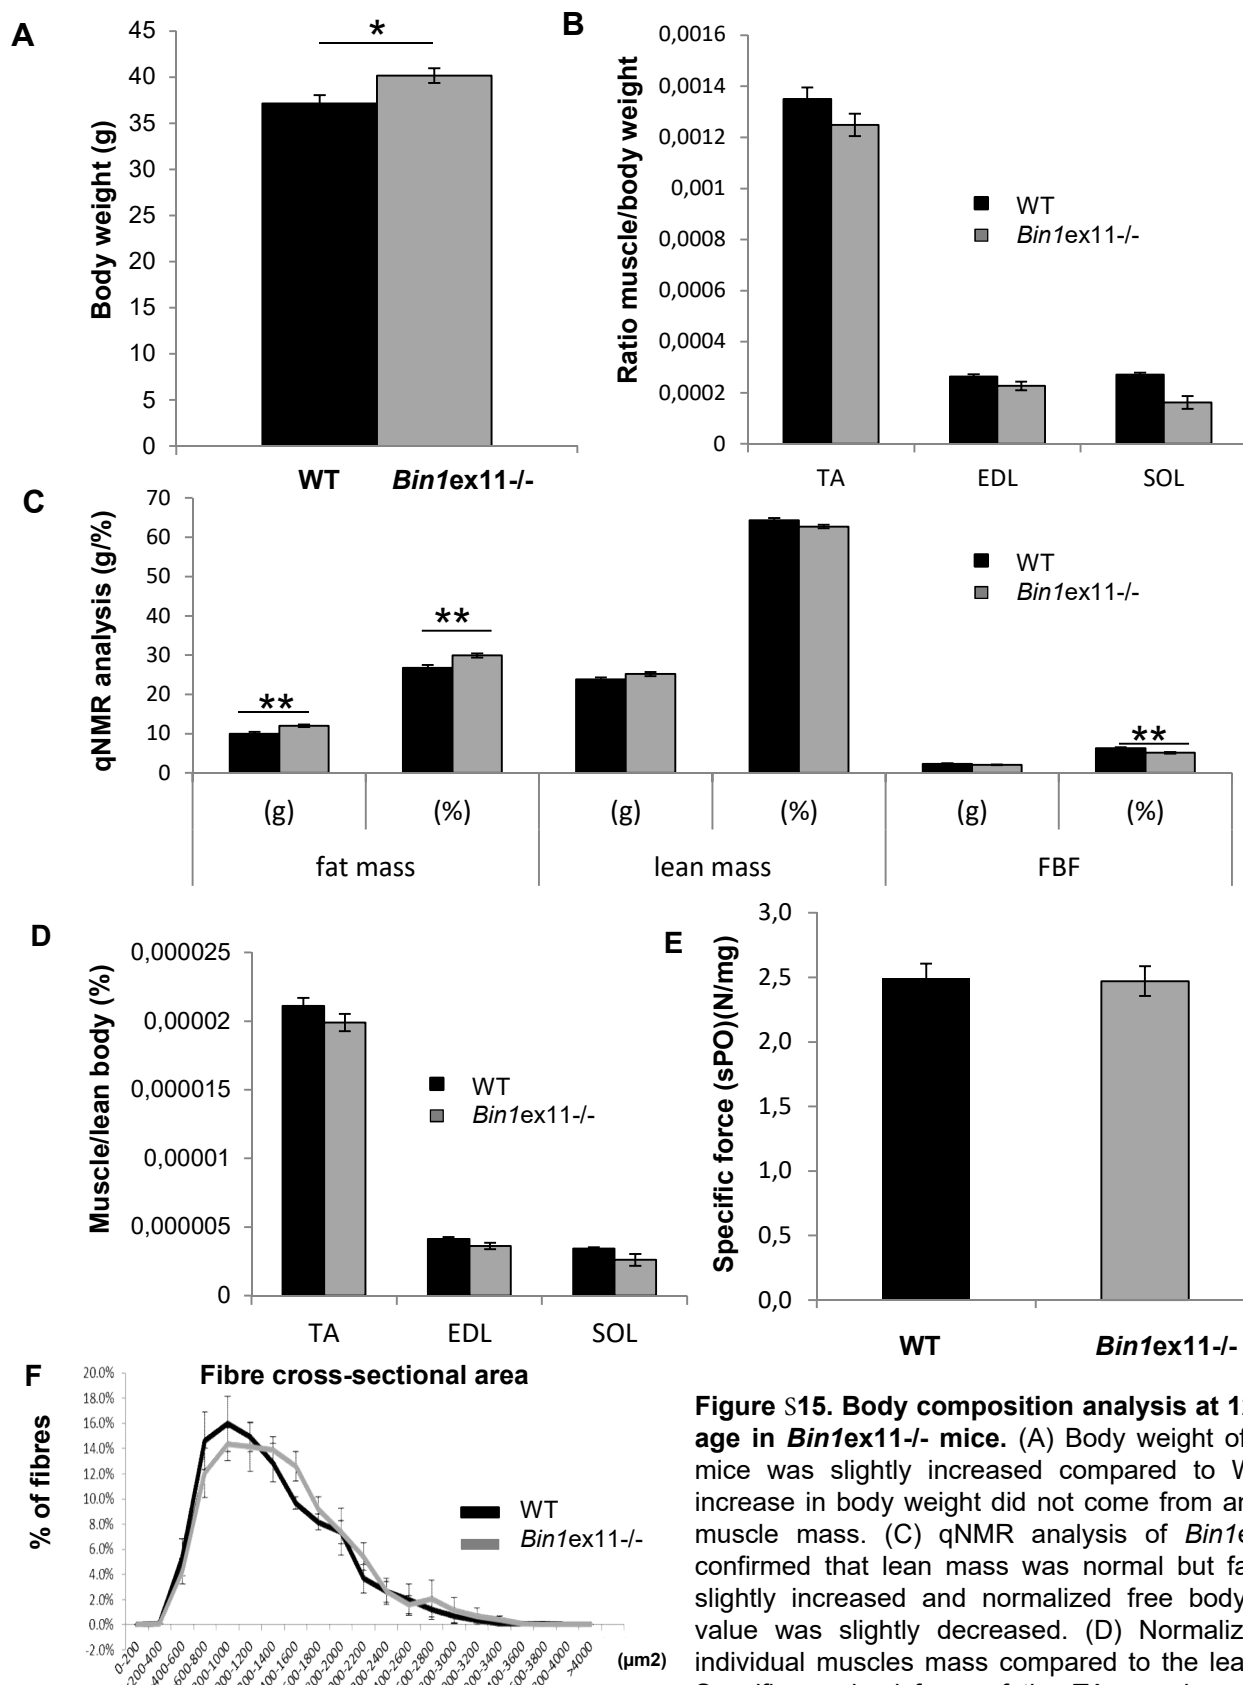

**Figure S15. Body composition analysis at 12 months of age in *Bin1ex11-/-* mice.** (A) Body weight of *Bin1ex11-/-* mice was slightly increased compared to WT. (B) The increase in body weight did not come from an increase in muscle mass. (C) qNMR analysis of *Bin1ex11-/-* mice confirmed that lean mass was normal but fat mass was slightly increased and normalized free body fluid (FBF) value was slightly decreased. (D) Normalization of the individual muscles mass compared to the lean tissue. (E) Specific maximal force of the TA muscle represents the absolute maximal force related to muscle weight. (F) TA muscles fiber cross-sectional area grouped into 200  $\mu\text{m}^2$  intervals and represented as the percentage of total fibers ( $n = 5-7$  mice). All graph depict mean  $\pm$  s.e.m. (\* $p < 0.05$ , \*\* $p < 0.01$ ) ( $n \geq 7$  mice per group). Student t-test.

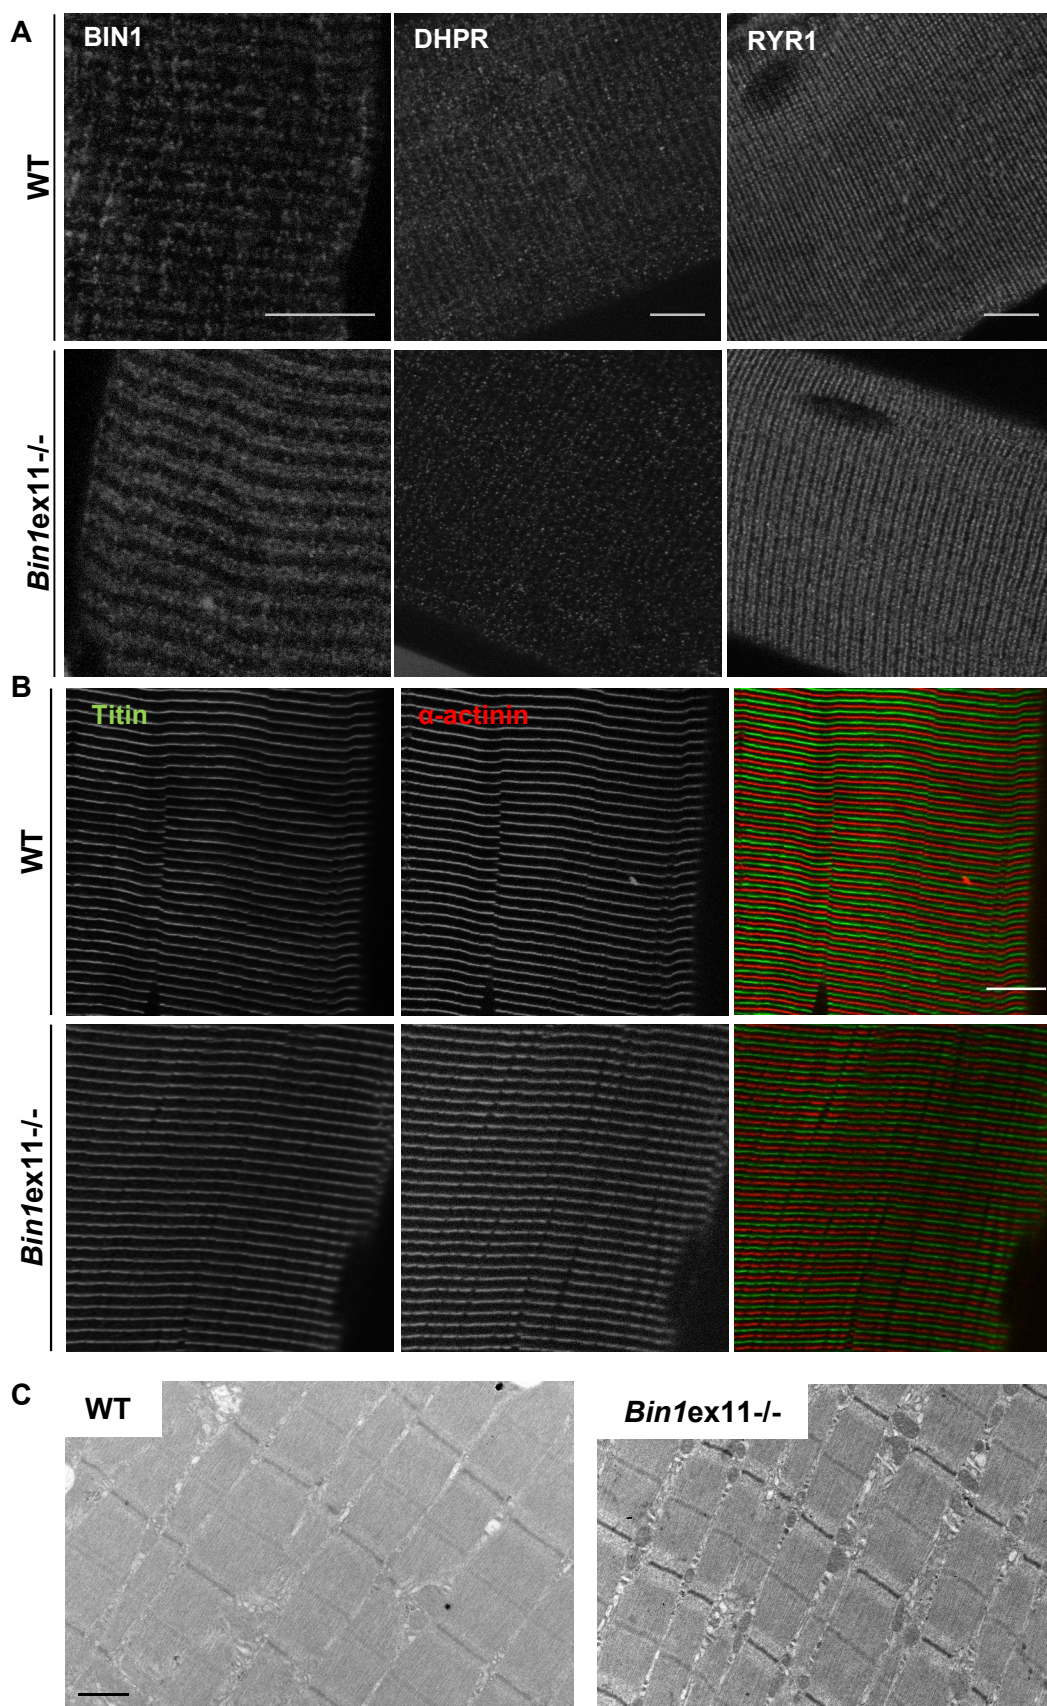

**Figure S16. Muscle organization in 12-month-old mice.** Sarcomere and triad organization is similar between *Bin1ex11<sup>-/-</sup>* and WT littermates. (A) Isolated fibers from EDL were stained with BIN1 (pan-isoform antibody), DHPR or RYR1 antibodies. Scale bar 10  $\mu$ m. (B) Isolated fibers from EDL were stained with titin (green) and  $\alpha$ -actinin (red) antibodies. Scale bar 10  $\mu$ m. (C) Sarcomere organization of TA assessed by electron microscopy. Scale bar 1  $\mu$ m.



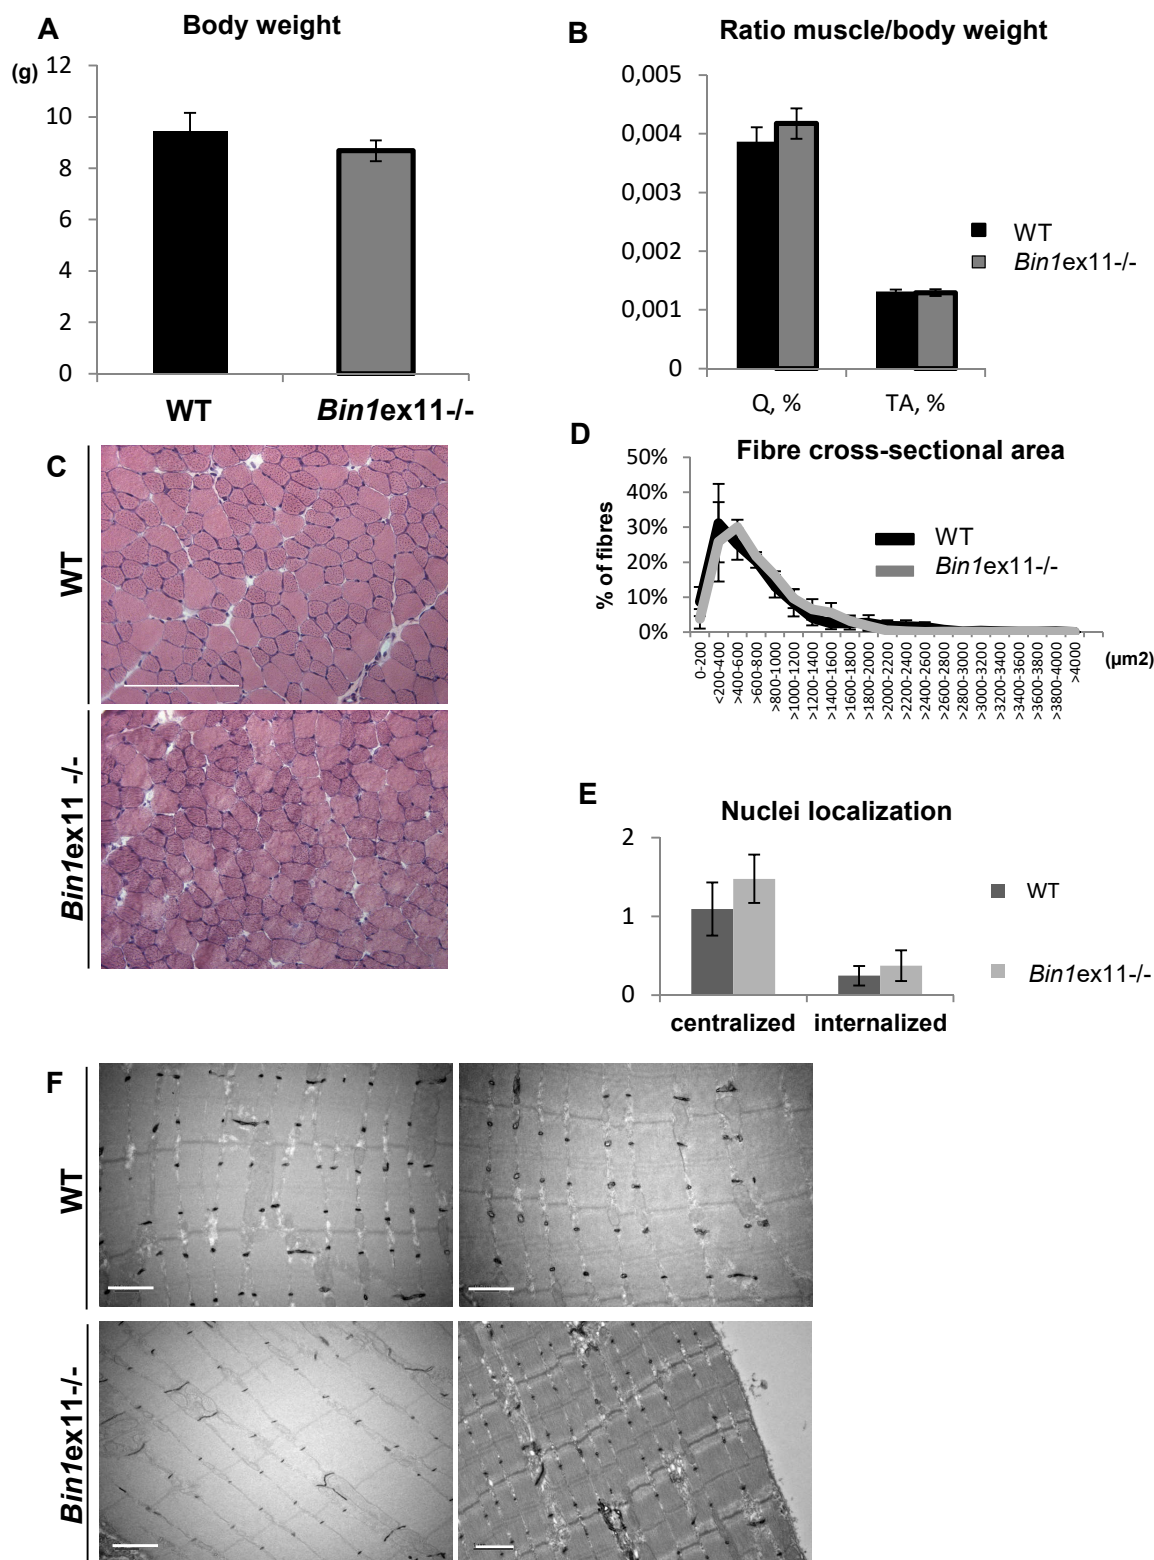

**Figure S17. Characterization of *Bin1ex11*<sup>-/-</sup> mice at 2 weeks of age during postnatal hypertrophy.** (A) Body weight. (B) Muscle weight normalized to body weight for quadriceps (Q) and *tibialis anterior* (TA). (C) Histological analysis with hematoxylin and eosin staining. Scale bar 100 µm. (D) TA fiber cross-sectional area grouped into 200 µm<sup>2</sup> intervals, and represented as the percentage of total fibers. N = 5-6 mice per group. (E) Frequency of fibers with internal or central nuclei. Internal nuclei are defined as not subsarcolemmal nor central. (F) Ultrastructural analysis of TA muscles and T-tubules through potassium ferrocyanide labeling. Scale bar 1 µm. No statistical differences.

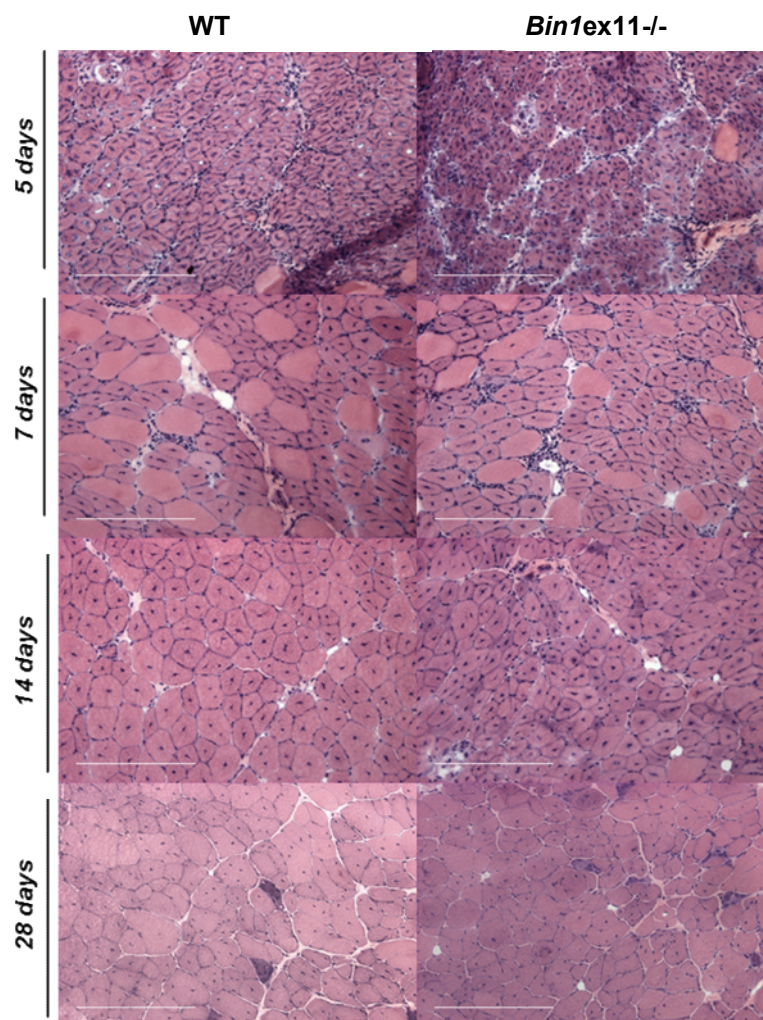

**Figure S18. Muscle regeneration induced by notexin injection in TA muscles of 12-week-old WT and *Bin1ex11*<sup>-/-</sup> mice.** Histology of the muscles stained with hematoxylin and eosin (HE) and observed at 5, 7, 14 and 28 days after the notexin injection. Scale bar 200  $\mu$ m.

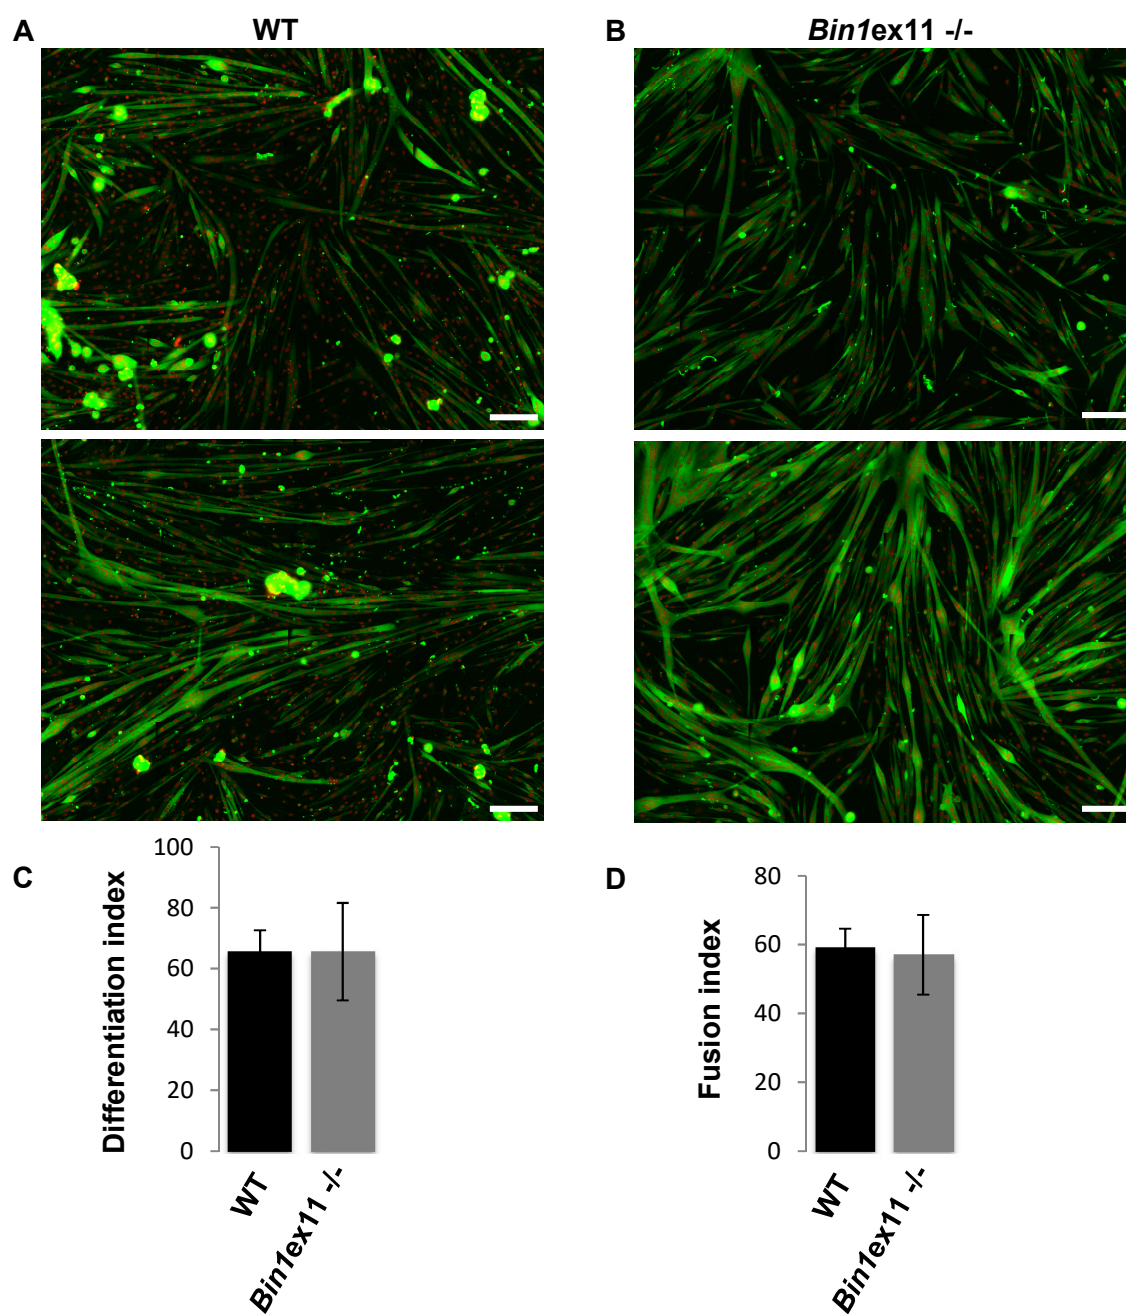

**Figure S19. *In vitro* differentiation of WT and *Bin1ex11*<sup>-/-</sup> myoblasts.** Representative immunofluorescence staining of myosin heavy chain (green; MF-20 antibody) and myonuclei (red; DAPI) of primary myotubes from WT (A) or *Bin1ex11*<sup>-/-</sup> (B) mice after 3 days of differentiation on matrigel. Image assembly of several fields of view. (C) The differentiation index quantifies the percentage of nuclei present in any MHC-positive cells over the total number of nuclei. (D) The fusion index quantifies the percentage of nuclei present in MHC-positive cells with more than 1 nuclei (myotubes) over the total number of nuclei. Scale Bar: 150µm. n=4; no statistical difference.

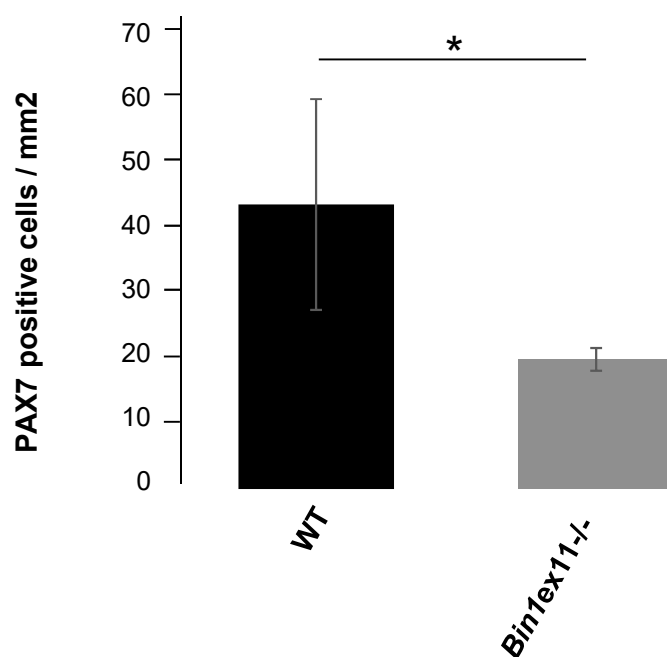

**Figure S20. PAX7 positive cells in muscles from WT and *Bin1ex11*<sup>-/-</sup> mice.** Muscle sections from 2-week-old WT and *Bin1ex11*<sup>-/-</sup> mice were labelled for PAX7, and the number of PAX7-positive cells per mm<sup>2</sup> was quantified. The graph depicts mean  $\pm$  SD (\* $p < 0.05$ ) ( $n = 4$  mice per group). Wilcoxon Mann-Whitney test.



| Isoforms | Included exons                | Included protein domains     | Expression      |
|----------|-------------------------------|------------------------------|-----------------|
| iso8     | 1 to 6, 8 to 12, 17 to 20     | N-BAR, PI, SH3               | Muscle-specific |
| iso9     | 1 to 6, 8 to 10, 12, 17 to 20 | N-BAR, SH3                   | Ubiquitous      |
| iso1     | 1 to 10, 12 to 20             | N-BAR, clathrin binding, SH3 | Neuronal        |

**Table S1. *Bin1* transcripts and expression.**

The *Bin1* gene has 20 exons; exon 17 is alternative in the different tissues.

| Mouse models                        | Deleted exon | Impact on BIN1 protein                                                    | Related figures         |
|-------------------------------------|--------------|---------------------------------------------------------------------------|-------------------------|
| <i>Bin1x20</i> <sup>-/-</sup>       | 20           | Near absence in all tissues                                               | 2, 3, 4; S1, S2, S3, S4 |
| <i>Bin1x20</i> <sup>+/-</sup>       | 20           | About 50% in all tissues                                                  | S5                      |
| <i>Bin1x20skm</i> <sup>-/-</sup>    | 20           | Near absence in skeletal muscles                                          | 2; S1                   |
| <i>Bin1x20skm(i)</i> <sup>-/-</sup> | 20           | Near absence in skeletal muscles (temporal induced deletion)              | 5; S6, S7               |
| <i>Bin1x11</i> <sup>-/-</sup>       | 11           | Absence of PI domain, Muscle-specific isoform transformed into ubiquitous | 6, 7, 8; S8 to S20      |

**Table S2. Mouse models analyzed in this study.**
